# Supplementary material
Source: PubMed Central journal article supplement (PMC8194629)
Supplement: boe-12-5-3037-s001.pdf [file boe-12-5-3037-s001.pdf]

## Disrupted signal variability of spontaneous neural activity in children with attention-deficit/hyperactivity disorder: supplement

ZHENYAN HU,<sup>1,4</sup> LU LIU,<sup>2,3,4</sup>  MENGJING WANG,<sup>1</sup> GAODING JIA,<sup>1</sup> HAIMEI LI,<sup>2,3</sup> FEIFEI SI,<sup>2,3</sup> MIN DONG,<sup>2,3</sup> QIUJIN QIAN,<sup>2,3,5</sup>  AND HAIJING NIU<sup>1,6</sup> 

<sup>1</sup>State Key Laboratory of Cognitive Neuroscience and Learning & IDG/McGovern Institute for Brain Research, Beijing Normal University, Beijing 100875, China

<sup>2</sup>Peking University Sixth Hospital/Institute of Mental Health, Beijing 100191, China

<sup>3</sup>NHC Key Laboratory of Mental Health (Peking University), National Clinical Research Center for Mental Disorders (Peking University Sixth Hospital), Beijing 100191, China

<sup>4</sup>Zhenyan Hu and Lu Liu contributed equally to this research

<sup>5</sup>qianqiujin@bjmu.edu.cn

<sup>6</sup>niuhjing@bnu.edu.cn

---

This supplement published with The Optical Society on 29 April 2021 by The Authors under the terms of the [Creative Commons Attribution 4.0 License](https://creativecommons.org/licenses/by/4.0/) in the format provided by the authors and unedited. Further distribution of this work must maintain attribution to the author(s) and the published article's title, journal citation, and DOI.

Supplement DOI: <https://doi.org/10.6084/m9.figshare.14465538>

Parent Article DOI: <https://doi.org/10.1364/BOE.418921>

**Table S1 Statistical values of group differences in measurement channels between ADHD and healthy controls**

| Channel Order | Network           | <i>P</i> value | <i>P</i> corrected value | <i>T</i> value |
|---------------|-------------------|----------------|--------------------------|----------------|
| 5             | Default           | 0.004          | 0.022                    | -3.008         |
| 19            | Default           | 0.015          | 0.049                    | -2.484         |
| 59            | Default           | 0.007          | 0.035                    | -2.767         |
| 64            | Default           | 0.002          | 0.016                    | -3.231         |
| 20            | Default           | 0.003          | 0.019                    | -3.086         |
| 22            | Default           | 0.006          | 0.030                    | 2.848          |
| 24            | Default           | 0.009          | 0.038                    | 2.694          |
| 3             | Frontoparietal    | 0.011          | 0.044                    | -2.606         |
| 75            | Frontoparietal    | 0.002          | 0.017                    | -3.155         |
| 74            | Frontoparietal    | 0.001          | 0.018                    | -3.334         |
| 52            | Frontoparietal    | 0.005          | 0.027                    | -2.907         |
| 49            | Ventral Attention | 0.001          | 0.010                    | -3.645         |
| 50            | Ventral Attention | 0.010          | 0.040                    | -2.659         |
| 40            | Ventral Attention | 0.015          | 0.050                    | -2.488         |
| 41            | Somatomotor       | 0.001          | 0.010                    | -3.567         |
| 42            | Somatomotor       | 0.002          | 0.016                    | -3.209         |
| 71            | Dorsal Attention  | 0.011          | 0.042                    | -2.603         |
| 76            | Dorsal Attention  | 0.002          | 0.018                    | -3.297         |
| 72            | Dorsal Attention  | 0.014          | 0.050                    | -2.506         |
| 70            | Dorsal Attention  | 0.008          | 0.039                    | -2.710         |
| 69            | Visual            | 0.012          | 0.044                    | -2.572         |
| 77            | Visual            | 0.000          | 0.009                    | -4.077         |
| 79            | Visual            | 0.002          | 0.018                    | -3.236         |
| 80            | Visual            | 0.000          | 0.011                    | -3.691         |
| 78            | Visual            | 0.000          | 0.011                    | -3.825         |

The *P* values was obtained using multiple linear regression model.

**Table S2 Statistical values of group differences in 6 functional networks in ADHD subtypes**

| Network     | <i>P</i> value | <i>P</i> corrected value | <i>T</i> value | ADHD subtypes |
|-------------|----------------|--------------------------|----------------|---------------|
| Whole Brain | 0.008          |                          | -2.743         | I             |
| Default     | 0.020          | 0.024                    | -2.395         | I             |

|                   |       |       |        |   |
|-------------------|-------|-------|--------|---|
| Frontoparietal    | 0.015 | 0.022 | -2.518 | I |
| Ventral Attention | 0.006 | 0.020 | -2.824 | I |
| Somatomotor       | 0.670 | 0.067 | -0.428 | I |
| Dorsal Attention  | 0.011 | 0.023 | -2.611 | I |
| Visual            | 0.002 | 0.014 | -3.178 | I |
| Whole Brain       | 0.013 |       | -2.577 | C |
| Default           | 0.092 | 0.092 | -1.715 | C |
| Frontoparietal    | 0.026 | 0.053 | -2.282 | C |
| Ventral Attention | 0.075 | 0.090 | -1.816 | C |
| Somatomotor       | 0.055 | 0.082 | -1.962 | C |
| Dorsal Attention  | 0.009 | 0.028 | -2.690 | C |
| Visual            | 0.001 | 0.008 | -3.401 | C |

---

The *P* value was obtained using multiple linear regression model.
